# Supplementary material
Source: PubMed Central journal article supplement (PMC3141974)
Supplement: 1107844108_pnas.1107844108_SI.pdf [file 1107844108_pnas.1107844108_SI.pdf]

# Supporting Information

Rockwell et al. 10.1073/pnas.1107844108

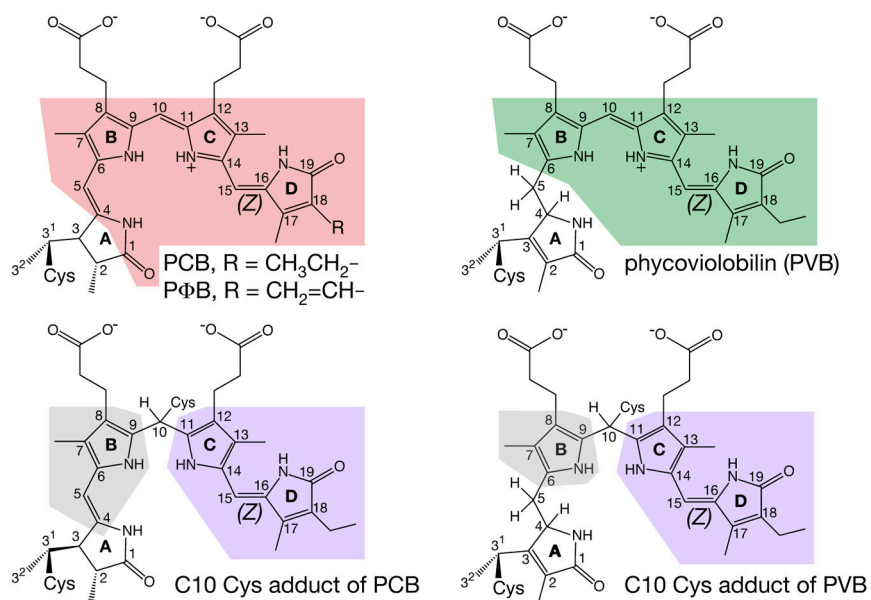

**Fig. S1.** Bilin chromophores of phytochromes and cyanobacteriochromes (CBCRs). Phycocyanobilin (PCB) or phytochromobilin (PΦB) precursors produce the covalent adduct shown in the *Upper Left* panel in the C5-*Z*,*syn* C10-*Z*,*syn* C15-*Z*,*anti* configuration of Cph1 in the *P<sub>r</sub>* state (1). Phycoviobilin (PVB) instead produces the adduct shown in the *Upper Right* panel. The second covalent linkage in dual-Cys photocycles takes place between the second Cys and the bilin C10 atom (*Lower*), and can occur with either PCB or PVB (2). Relevant conjugated systems are colored according to the color of light they absorb. Thus, unmodified PCB is colored red to match its red absorbance, and so forth.

1 Essen LO, Mailliet J, Hughes J (2008) The structure of a complete phytochrome sensory module in the *P<sub>r</sub>* ground state. *Proc Natl Acad Sci USA* 105:14709–14714.

2 Ishizuka T, et al. (2011) The cyanobacteriochrome, TePixJ, isomerizes its own chromophore by converting phycocyanobilin to phycoviobilin. *Biochemistry* 50:953–961.













Table S3. Accession information for insert-Cys CBCRs\*

| Name <sup>†</sup>  | Locus tag        | Organism                                          | Amino acids |
|--------------------|------------------|---------------------------------------------------|-------------|
| Aazo_4225          | Aazo_4225        | <i>Nostoc azollae</i> 0708                        | 650–791     |
| AmaxDRAFT_4613     | AmaxDRAFT_4613   | <i>Arthrospira maxima</i> CS-328                  | 387–510     |
| NIES39_J03990-GAF2 | NIES39_J03990    | <i>Arthrospira platensis</i> NIES-39              | 349–472     |
| MC7420_3869        | MC7420_3869      | <i>Microcoleus chthonoplastes</i> PCC 7420        | 378–501     |
| Sy7002A0689        | SYNPCC7002_A0689 | <i>Synechococcus</i> sp. PCC 7002                 | 211–337     |
| cce_1413           | cce_1413         | <i>Cyanothece</i> sp. ATCC 51142                  | 219–337     |
| cce_4289           | cce_4289         | <i>Cyanothece</i> sp. ATCC 51142                  | 236–350     |
| CY0110_23126       | CY0110_23126     | <i>Cyanothece</i> sp. CCY0110                     | 214–327     |
| Ct8802_1740-GAF2   | Cyan8802_1740    | <i>Cyanothece</i> sp. PCC 8802                    | 225–343     |
| NpF2164-GAF2       | Npun_F2164       | <i>Nostoc punctiforme</i> ATCC 29133 <sup>‡</sup> | 287–415     |
| S7335_348          | S7335_348        | <i>Synechococcus</i> sp. PCC 7335                 | 47–165      |
| Ct7822_2884-GAF2   | Cyan7822_2884    | <i>Cyanothece</i> sp. PCC 7822                    | 250–368     |
| Ct7822_5290-GAF2   | Cyan7822_5290    | <i>Cyanothece</i> sp. PCC 7822                    | 275–392     |
| Ct7424_1855-GAF2   | PCC7424_1855     | <i>Cyanothece</i> sp. PCC 7424                    | 259–377     |
| MC7420_107         | MC7420_107       | <i>Microcoleus chthonoplastes</i> PCC 7420        | 264–382     |
| Aazo_0203          | Aazo_0203        | <i>Nostoc azollae</i> 0708                        | 294–411     |
| NpR1597-GAF2 (UB1) | Npun_R1597       | <i>Nostoc punctiforme</i> ATCC 29133 <sup>‡</sup> | 254–372     |
| Ava_1210           | Ava_1210         | <i>Anabaena variabilis</i> ATCC 29413             | 252–370     |
| all4261-GAF2       | all4261          | <i>Nostoc</i> sp. PCC 7120                        | 252–370     |
| L8106_25145        | L8106_25145      | <i>Lyngbya</i> sp. PCC 8106                       | 564–688     |
| L8106_05116-GAF4   | L8106_05116      | <i>Lyngbya</i> sp. PCC 8106                       | 954–1072    |
| MC7420_7724-GAF2   | MC7420_7724      | <i>Microcoleus chthonoplastes</i> PCC 7420        | 499–650     |
| NIES39_C00690      | NIES39_C00690    | <i>Arthrospira platensis</i> NIES-39              | 407–529     |
| L8106_24225-GAF2   | L8106_24225      | <i>Lyngbya</i> sp. PCC 8106                       | 385–508     |
| Osci3400013        | Osci_3400013     | <i>Oscillatoria</i> sp. PCC 6506                  | 567–690     |
| Ct8802_4055-GAF3   | Cyan8802_4055    | <i>Cyanothece</i> sp. PCC 8802                    | 492–617     |
| Ct8802_4055-GAF4   | Cyan8802_4055    | <i>Cyanothece</i> sp. PCC 8802                    | 701–824     |
| Ct8802_4055-GAF2   | Cyan8802_4055    | <i>Cyanothece</i> sp. PCC 8802                    | 285–408     |
| NpF2164-GAF3 (VO1) | Npun_F2164       | <i>Nostoc punctiforme</i> ATCC 29133 <sup>‡</sup> | 499–622     |
| CwDRAFT_2358       | CwatDRAFT_2358   | <i>Crocospaera watsonii</i> WH 8501               | 106–230     |
| Ct8802_4055-GAF5   | Cyan8802_4055    | <i>Cyanothece</i> sp. PCC 8802                    | 901–1026    |

\*Accession information is provided in the form of the GenBank locus tag. The numbers of the aligned amino acids are shown, corresponding to the first through sixth GAF beta strands. This alignment is intended to show the sequence diversity in this subfamily; therefore, some identical CBCR sequences from closely related *Cyanothece* and *Arthrospira* species are not shown.

<sup>†</sup>Name given in Fig. S3.

<sup>‡</sup>Also known as *Nostoc punctiforme* sp. PCC 73102.
